# Supplementary material for: Nanostructure engineering of two-dimensional diamonds toward high thermal conductivity and approaching zero Poisson's ratio
Source: Royal Society of Chemistry journal article supplement (doi:10.1039/d2cp01745h), 2022-01-01
Supplement: d2cp01745h1.pdf [file d2cp01745h1.pdf]

**Nanostructure engineering of two-dimensional diamond towards  
high thermal conductivity and approaching zero Poisson's ratio**

Yanxiao Hu<sup>1</sup>, Ding Li<sup>1</sup>, Chunbao Feng<sup>1</sup>, Shichang Li<sup>1</sup>, Bole Chen<sup>1</sup>, Dengfeng Li<sup>1\*</sup>,  
Gang Zhang<sup>2\*</sup>

1. School of Science, Chongqing University of Posts and Telecommunications, Chongqing,  
400065, China.

2. Institute of High Performance Computing, A\*STAR, 138632, Singapore

\*Corresponding authors. E-mail: [lidf@cqupt.edu.cn](mailto:lidf@cqupt.edu.cn)(D.F.Li); [zhangg@ihpc.a-star.edu.sg](mailto:zhangg@ihpc.a-star.edu.sg)  
(G. Zhang)

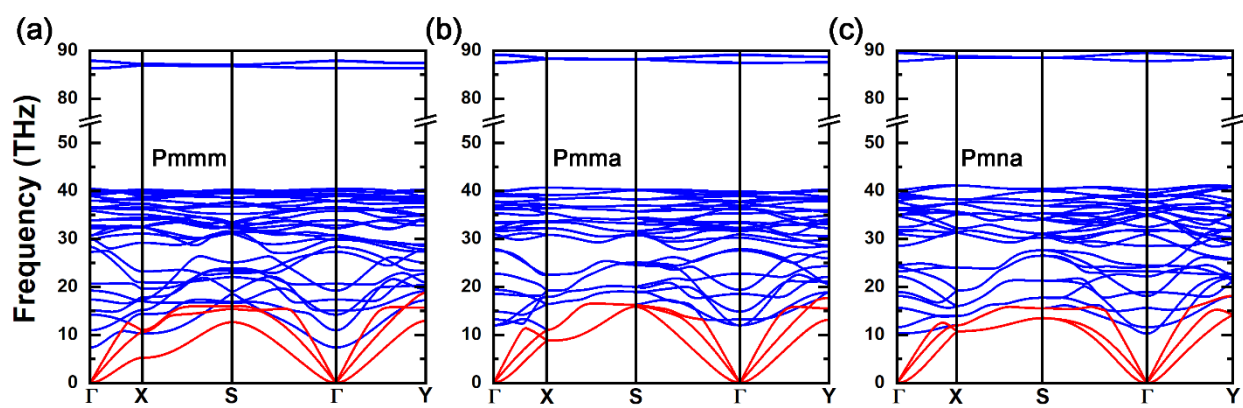

Fig.S1 The complete phonon dispersions of (a) *Pmmm*, (b) *Pmma*, (c) *Pmna* diamane.

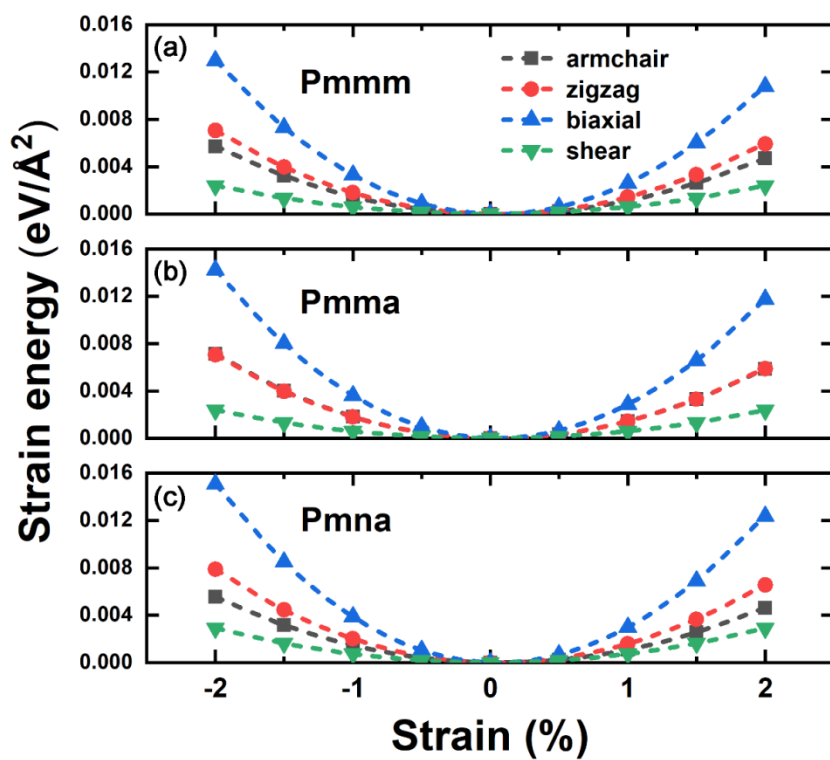

Fig.S2 The strain-energy vs. strain curves of (a) *Pmmm*, (b) *Pmma*, (c) *Pmna* diamane.

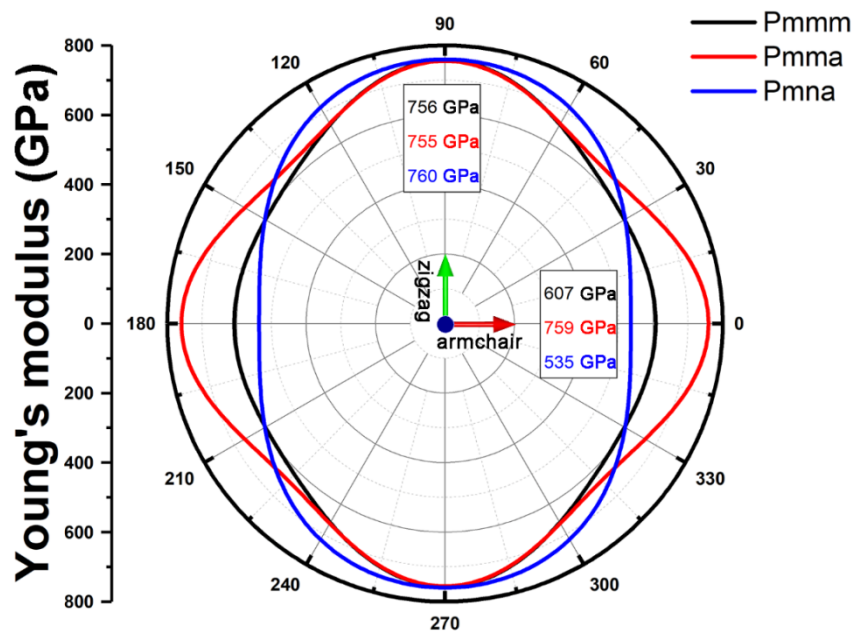

Fig.S3 The polar angle  $\theta$ -dependent Young's modulus of rectangular diamanes in unit of GPa.
